# Supplementary material for: Salivary Antioxidant Barrier, Redox Status, and Oxidative Damage to Proteins and Lipids in Healthy Children, Adults, and the Elderly
Source: Hindawi journal article supplement (doi:10.1155/2019/4393460), 2019-12-05
Supplement: f1 [file 4393460.f1.pdf]

**Table 1. R value of correlations between non-stimulated saliva (NWS) and plasma/erythrocytes redox biomarkers in healthy children aged 2-14.**

|          | CAT erythrocytes | GPx erythrocytes | SOD erythrocytes | GSH plasma | UA plasma | TAC plasma | TOS plasma | AGE plasma | AOPP plasma | MDA plasma |
|----------|------------------|------------------|------------------|------------|-----------|------------|------------|------------|-------------|------------|
| CAT NWS  | -0.003           | -0.049           | 0.045            | -0.03      | 0.037     | -0.287     | 0.006      | 0.27       | -0.261      | 0.249      |
| Px NWS   | -0.137           | -0.148           | 0.065            | -0.081     | -0.065    | -0.264     | 0.158      | 0.041      | 0.109       | -0.028     |
| SOD NWS  | 0.247            | -0.1             | 0.012            | 0.155      | -0.19     | 0.229      | -0.069     | 0.136      | -0.041      | 0.283      |
| GSH NWS  | 0.018            | 0.173            | 0.711            | 0.217      | -0.047    | -0.264     | 0.072      | -0.334     | -0.274      | -0.287     |
| UA NWS   | 0.141            | -0.048           | -0.403           | -0.217     | -0.221    | -0.104     | -0.121     | 0.126      | 0.036       | 0.226      |
| TAC NWS  | -0.032           | 0.026            | 0.157            | 0.327      | -0.096    | -0.172     | -0.283     | 0.03       | -0.075      | -0.361     |
| TOS NWS  | 0.009            | 0.266            | 0.281            | 0.034      | -0.212    | 0.036      | 0.124      | -0.097     | -0.193      | 0.021      |
| AGE NWS  | -0.03            | -0.062           | -0.001           | 0.029      | -0.387    | 0.029      | 0.052      | 0.637      | 0.03        | 0.147      |
| AOPP NWS | -0.304           | -0.038           | -0.133           | 0.225      | -0.106    | -0.126     | -0.079     | 0.27       | 0.548       | 0.341      |
| MDA NWS  | -0.102           | -0.085           | -0.216           | -0.082     | -0.35     | -0.054     | -0.093     | 0.307      | -0.005      | 0.541      |

**Table 2. P value of correlations between non-stimulated saliva (NWS) and plasma/erythrocytes redox biomarkers in healthy children aged 2-14.**

|          | CAT erythrocytes | GPx erythrocytes | SOD erythrocytes | GSH plasma | UA plasma | TAC plasma | TOS plasma | AGE plasma | AOPP plasma | MDA plasma |
|----------|------------------|------------------|------------------|------------|-----------|------------|------------|------------|-------------|------------|
| CAT NWS  | 0.986            | 0.798            | 0.813            | 0.874      | 0.845     | 0.125      | 0.976      | 0.15       | 0.164       | 0.185      |
| Px NWS   | 0.469            | 0.436            | 0.733            | 0.669      | 0.733     | 0.158      | 0.403      | 0.828      | 0.565       | 0.885      |
| SOD NWS  | 0.189            | 0.599            | 0.951            | 0.414      | 0.315     | 0.224      | 0.715      | 0.473      | 0.831       | 0.13       |
| GSH NWS  | 0.924            | 0.361            | 1.06E-05         | 0.249      | 0.805     | 0.159      | 0.707      | 0.071      | 0.142       | 0.124      |
| UA NWS   | 0.458            | 0.8              | 0.027            | 0.25       | 0.24      | 0.584      | 0.523      | 0.505      | 0.85        | 0.231      |
| TAC NWS  | 0.866            | 0.891            | 0.408            | 0.077      | 0.613     | 0.364      | 0.129      | 0.873      | 0.695       | 0.05       |
| TOS NWS  | 0.962            | 0.155            | 0.133            | 0.858      | 0.26      | 0.851      | 0.515      | 0.611      | 0.307       | 0.91       |
| AGE NWS  | 0.875            | 0.744            | 0.998            | 0.878      | 0.034     | 0.881      | 0.785      | 1.53E-04   | 0.874       | 0.438      |
| AOPP NWS | 0.103            | 0.841            | 0.485            | 0.233      | 0.576     | 0.508      | 0.678      | 0.15       | 0.002       | 0.065      |
| MDA NWS  | 0.591            | 0.654            | 0.252            | 0.666      | 0.058     | 0.776      | 0.625      | 0.099      | 0.978       | 0.002      |

**Table 3. R value of correlations between stimulated saliva (SWS) and plasma/erythrocytes redox biomarkers in healthy children aged 2-14.**

|          | CAT erythrocytes | GPx erythrocytes | SOD erythrocytes | GSH plasma | UA plasma | TAC plasma | TOS plasma | AGE plasma | AOPP plasma | MDA plasma |
|----------|------------------|------------------|------------------|------------|-----------|------------|------------|------------|-------------|------------|
| CAT SWS  | -0.272           | 0.254            | 0.167            | -0.213     | -0.223    | 0.044      | -0.194     | 0.202      | 0.018       | 0.18       |
| Px SWS   | 0.129            | 0.007            | 0.062            | -0.446     | -0.053    | 0.195      | 0.029      | -0.373     | -0.011      | -0.036     |
| SOD SWS  | 0.181            | -0.142           | -0.086           | -0.348     | -0.013    | 0.263      | -0.067     | -0.161     | 0.144       | 0.207      |
| GSH SWS  | -0.102           | 0.023            | 0.161            | -0.085     | -0.433    | 0.298      | -0.102     | 0.022      | -0.359      | 0.067      |
| UA SWS   | 0.079            | -0.369           | -0.04            | -0.072     | 0.187     | -0.113     | -0.036     | -0.216     | -0.254      | 0.055      |
| TAC SWS  | -0.476           | -0.016           | 0.262            | 0.248      | 0.053     | -0.454     | -0.098     | -0.16      | -0.035      | -0.001     |
| TOS SWS  | 0.233            | -0.508           | -0.291           | -0.208     | 0.131     | 0.085      | -0.047     | -0.129     | 0.071       | -0.072     |
| AGE SWS  | 0.157            | -0.354           | 0.148            | -0.479     | -0.122    | 0.001      | -0.084     | -0.198     | -0.271      | -0.108     |
| AOPP SWS | 0.096            | -0.092           | -0.087           | 0.003      | -0.083    | 0.193      | -0.089     | 0.02       | -0.041      | 0.357      |
| MDA SWS  | 0.177            | 0.216            | -0.028           | -0.276     | -0.13     | 0.237      | -0.131     | -0.136     | -0.077      | 0.194      |

**Table 4. P value of correlations between stimulated saliva (SWS) and plasma/erythrocytes redox biomarkers in healthy children aged 2-14.**

|          | CAT erythrocytes | GPx erythrocytes | SOD erythrocytes | GSH plasma | UA plasma | TAC plasma | TOS plasma | AGE plasma | AOPP plasma | MDA plasma |
|----------|------------------|------------------|------------------|------------|-----------|------------|------------|------------|-------------|------------|
| CAT SWS  | 0.146            | 0.175            | 0.379            | 0.259      | 0.237     | 0.816      | 0.304      | 0.284      | 0.923       | 0.341      |
| Px SWS   | 0.499            | 0.97             | 0.747            | 0.014      | 0.782     | 0.301      | 0.879      | 0.042      | 0.956       | 0.852      |
| SOD SWS  | 0.34             | 0.455            | 0.651            | 0.06       | 0.944     | 0.161      | 0.725      | 0.396      | 0.446       | 0.273      |
| GSH SWS  | 0.593            | 0.906            | 0.395            | 0.655      | 0.017     | 0.11       | 0.591      | 0.908      | 0.051       | 0.725      |
| UA SWS   | 0.678            | 0.045            | 0.834            | 0.704      | 0.323     | 0.554      | 0.85       | 0.251      | 0.176       | 0.772      |
| TAC SWS  | 0.008            | 0.933            | 0.162            | 0.187      | 0.78      | 0.012      | 0.608      | 0.399      | 0.856       | 0.997      |
| TOS SWS  | 0.216            | 0.004            | 0.119            | 0.271      | 0.489     | 0.655      | 0.806      | 0.495      | 0.71        | 0.705      |
| AGE SWS  | 0.409            | 0.055            | 0.435            | 0.007      | 0.521     | 0.996      | 0.661      | 0.293      | 0.148       | 0.571      |
| AOPP SWS | 0.612            | 0.628            | 0.648            | 0.988      | 0.663     | 0.306      | 0.641      | 0.917      | 0.83        | 0.053      |
| MDA SWS  | 0.35             | 0.252            | 0.882            | 0.141      | 0.493     | 0.206      | 0.491      | 0.475      | 0.686       | 0.305      |

**Table 5. R value of correlations between non-stimulated saliva (NWS) and plasma/erythrocytes redox biomarkers in healthy adults aged 25-45.**

|          | CAT erythrocytes | GPx erythrocytes | SOD erythrocytes | GSH plasma | UA plasma | TAC plasma | TOS plasma | AGE plasma | AOPP plasma | MDA plasma |
|----------|------------------|------------------|------------------|------------|-----------|------------|------------|------------|-------------|------------|
| CAT NWS  | 0.074            | 0.094            | -0.287           | -0.09      | -0.277    | 0.052      | -0.102     | 0.273      | 0.059       | 0.071      |
| Px NWS   | -0.018           | 0.232            | 0.259            | -0.12      | -0.232    | 0.358      | -0.224     | 0.178      | -0.054      | -0.003     |
| SOD NWS  | 0.038            | 0.005            | -0.052           | -0.102     | -0.178    | -0.365     | -0.162     | 0.249      | -0.136      | 0.05       |
| GSH NWS  | 0.269            | 0.02             | -0.041           | -0.016     | 0.047     | -0.014     | 0.01       | -0.018     | -0.292      | 0.259      |
| UA NWS   | 0.223            | -0.139           | 0.334            | -0.269     | 0.35      | -0.203     | 0.437      | -0.267     | -0.222      | -0.109     |
| TAC NWS  | 0.019            | -0.055           | 0.185            | 0.41       | 0.03      | -0.191     | -0.198     | -0.159     | 0.07        | 0.303      |
| TOS NWS  | 0.121            | 0.053            | -0.105           | 0.097      | -0.288    | 0.191      | -0.153     | 0.116      | -0.082      | 0.205      |
| AGE NWS  | 0.13             | 0.219            | 0.104            | -0.142     | -0.234    | 0.106      | 0.022      | 0.586      | 0.082       | 0.015      |
| AOPP NWS | 0.042            | -0.168           | 0.067            | 0.135      | -0.014    | -0.074     | 0.085      | 0.006      | 0.547       | -0.042     |
| MDA NWS  | -0.01            | -0.191           | 0.118            | -0.338     | -0.015    | 0.118      | 0.155      | -0.033     | -0.407      | 0.318      |

**Table 6. P value of correlations between non-stimulated saliva (NWS) and plasma/erythrocytes redox biomarkers in healthy adults aged 25-45.**

|          | CAT erythrocytes | GPx erythrocytes | SOD erythrocytes | GSH plasma | UA plasma | TAC plasma | TOS plasma | AGE plasma | AOPP plasma | MDA plasma |
|----------|------------------|------------------|------------------|------------|-----------|------------|------------|------------|-------------|------------|
| CAT NWS  | 0.696            | 0.623            | 0.124            | 0.637      | 0.139     | 0.784      | 0.593      | 0.144      | 0.756       | 0.709      |
| Px NWS   | 0.925            | 0.218            | 0.167            | 0.526      | 0.217     | 0.052      | 0.234      | 0.348      | 0.775       | 0.988      |
| SOD NWS  | 0.844            | 0.978            | 0.785            | 0.592      | 0.346     | 0.047      | 0.394      | 0.184      | 0.474       | 0.792      |
| GSH NWS  | 0.151            | 0.917            | 0.829            | 0.931      | 0.806     | 0.941      | 0.96       | 0.924      | 0.118       | 0.167      |
| UA NWS   | 0.236            | 0.464            | 0.071            | 0.151      | 0.058     | 0.283      | 0.016      | 0.153      | 0.239       | 0.566      |
| TAC NWS  | 0.922            | 0.774            | 0.327            | 0.024      | 0.875     | 0.312      | 0.295      | 0.401      | 0.715       | 0.104      |
| TOS NWS  | 0.523            | 0.783            | 0.582            | 0.61       | 0.122     | 0.311      | 0.42       | 0.54       | 0.666       | 0.278      |
| AGE NWS  | 0.492            | 0.245            | 0.584            | 0.455      | 0.213     | 0.579      | 0.908      | 0.001      | 0.668       | 0.938      |
| AOPP NWS | 0.825            | 0.374            | 0.727            | 0.478      | 0.94      | 0.696      | 0.654      | 0.973      | 0.002       | 0.826      |
| MDA NWS  | 0.959            | 0.313            | 0.533            | 0.067      | 0.935     | 0.536      | 0.413      | 0.863      | 0.026       | 0.087      |

**Table 7. R value of correlations between stimulated saliva (SWS) and plasma/erythrocytes redox biomarkers in healthy adults aged 25-45.**

|          | CAT erythrocytes | GPx erythrocytes | SOD erythrocytes | GSH plasma | UA plasma | TAC plasma | TOS plasma | AGE plasma | AOPP plasma | MDA plasma |
|----------|------------------|------------------|------------------|------------|-----------|------------|------------|------------|-------------|------------|
| CAT SWS  | -0.035           | 0.222            | -0.243           | -0.211     | -0.088    | 0.131      | -0.049     | 0.441      | -0.208      | 0.387      |
| Px SWS   | -0.113           | -0.191           | 0.155            | -0.272     | 0.216     | 0.084      | 0.273      | 0.049      | -0.047      | -0.046     |
| SOD SWS  | 0.303            | -0.037           | -0.161           | -0.153     | -0.208    | -0.138     | -0.107     | 0.321      | -0.052      | 0.1        |
| GSH SWS  | 0.036            | 0.12             | 0.063            | -0.172     | -0.203    | -0.153     | -0.171     | 0.011      | -0.125      | -0.002     |
| UA SWS   | -0.255           | 0.086            | -0.199           | -0.099     | 0.087     | 0.241      | 0.045      | -0.017     | 0.002       | 0.033      |
| TAC SWS  | 0.055            | -0.001           | -0.049           | 0.039      | 0.236     | 0.193      | 0.306      | -0.173     | -0.103      | -0.117     |
| TOS SWS  | 0.175            | -0.068           | -0.17            | 0.164      | -0.229    | 0.091      | -0.085     | 0.07       | -0.011      | 0.255      |
| AGE SWS  | 0.111            | 0.047            | 0.229            | 0.021      | -0.076    | -0.035     | 0.016      | 0.248      | 0.195       | -0.188     |
| AOPP SWS | -0.107           | -0.148           | 0.133            | 0.038      | -0.259    | 0.074      | -0.059     | 0.102      | 0.18        | -0.35      |
| MDA SWS  | 0.107            | -0.086           | -0.327           | -0.002     | 0.077     | -0.045     | 0.243      | 0.189      | -0.124      | 0.55       |

**Table 8. P value of correlations between stimulated saliva (SWS) and plasma/erythrocytes redox biomarkers in healthy adults aged 25-45.**

|          | CAT erythrocytes | GPx erythrocytes | SOD erythrocytes | GSH plasma | UA plasma | TAC plasma | TOS plasma | AGE plasma | AOPP plasma | MDA plasma |
|----------|------------------|------------------|------------------|------------|-----------|------------|------------|------------|-------------|------------|
| CAT SWS  | 0.855            | 0.238            | 0.196            | 0.263      | 0.645     | 0.489      | 0.795      | 0.015      | 0.27        | 0.035      |
| Px SWS   | 0.558            | 0.321            | 0.423            | 0.153      | 0.261     | 0.665      | 0.151      | 0.8        | 0.81        | 0.812      |
| SOD SWS  | 0.104            | 0.845            | 0.395            | 0.419      | 0.269     | 0.467      | 0.572      | 0.083      | 0.786       | 0.6        |
| GSH SWS  | 0.85             | 0.528            | 0.739            | 0.363      | 0.283     | 0.419      | 0.365      | 0.953      | 0.51        | 0.992      |
| UA SWS   | 0.174            | 0.652            | 0.291            | 0.603      | 0.646     | 0.199      | 0.813      | 0.928      | 0.991       | 0.861      |
| TAC SWS  | 0.772            | 0.997            | 0.795            | 0.84       | 0.209     | 0.308      | 0.1        | 0.362      | 0.588       | 0.538      |
| TOS SWS  | 0.355            | 0.722            | 0.37             | 0.386      | 0.224     | 0.631      | 0.654      | 0.713      | 0.954       | 0.174      |
| AGE SWS  | 0.559            | 0.807            | 0.223            | 0.912      | 0.689     | 0.853      | 0.935      | 0.187      | 0.301       | 0.321      |
| AOPP SWS | 0.575            | 0.435            | 0.483            | 0.842      | 0.166     | 0.696      | 0.757      | 0.591      | 0.342       | 0.058      |
| MDA SWS  | 0.574            | 0.653            | 0.078            | 0.991      | 0.685     | 0.814      | 0.196      | 0.317      | 0.514       | 0.002      |

**Table 9. R value of correlations between non-stimulated saliva (NWS) and plasma/erythrocytes redox biomarkers in healthy elderly people aged 65-85.**

|          | CAT erythrocytes | GPx erythrocytes | SOD erythrocytes | GSH plasma | UA plasma | TAC plasma | TOS plasma | AGE plasma | AOPP plasma | MDA plasma |
|----------|------------------|------------------|------------------|------------|-----------|------------|------------|------------|-------------|------------|
| CAT NWS  | -0.347           | 0.307            | 0.25             | -0.059     | 0.269     | 0.059      | 0.05       | 0.004      | 0.191       | 0.015      |
| Px NWS   | -0.176           | -0.096           | -0.01            | -0.15      | 0.015     | 0.454      | 0.273      | -0.12      | -0.252      | 0.159      |
| SOD NWS  | -0.009           | -0.095           | 0.179            | 0.187      | 0.189     | 0.062      | -0.344     | 0.034      | -0.081      | -0.053     |
| GSH NWS  | -0.303           | 0.303            | 0.27             | -0.016     | -0.047    | -0.284     | 0.192      | 0.03       | 0.035       | 0.004      |
| UA NWS   | -0.037           | -0.438           | 0.123            | 0.48       | -0.108    | -0.071     | -0.355     | -0.19      | 0.281       | 0.052      |
| TAC NWS  | 0.173            | 0.113            | 0.255            | -0.144     | 0.031     | -0.194     | 0.385      | 0.256      | -0.228      | -0.138     |
| TOS NWS  | -0.011           | -0.065           | 0.142            | -0.002     | 0.07      | 0.243      | -0.45      | -0.101     | -0.066      | 0.435      |
| AGE NWS  | 0.189            | -0.069           | 0.148            | 0.152      | 0.155     | 0.044      | -0.281     | 0.394      | -0.072      | 0.176      |
| AOPP NWS | 0.067            | 0.043            | -0.269           | -0.006     | -0.223    | 0.121      | -0.157     | -0.136     | 0.698       | -0.139     |
| MDA NWS  | 0.212            | -0.08            | 0.363            | -0.013     | -0.131    | 0.331      | -0.336     | -0.152     | 0.029       | 0.864      |

**Table 10. P value of correlations between non-stimulated saliva (NWS) and plasma/erythrocytes redox biomarkers in healthy elderly people aged 65-85.**

|          | CAT erythrocytes | GPx erythrocytes | SOD erythrocytes | GSH plasma | UA plasma | TAC plasma | TOS plasma | AGE plasma | AOPP plasma | MDA plasma |
|----------|------------------|------------------|------------------|------------|-----------|------------|------------|------------|-------------|------------|
| CAT NWS  | 0.061            | 0.099            | 0.182            | 0.758      | 0.15      | 0.755      | 0.793      | 0.985      | 0.312       | 0.935      |
| Px NWS   | 0.351            | 0.614            | 0.957            | 0.43       | 0.937     | 0.012      | 0.145      | 0.529      | 0.18        | 0.401      |
| SOD NWS  | 0.962            | 0.619            | 0.343            | 0.322      | 0.317     | 0.746      | 0.063      | 0.86       | 0.671       | 0.782      |
| GSH NWS  | 0.103            | 0.104            | 0.149            | 0.934      | 0.805     | 0.129      | 0.311      | 0.876      | 0.856       | 0.982      |
| UA NWS   | 0.847            | 0.016            | 0.518            | 0.007      | 0.57      | 0.709      | 0.054      | 0.314      | 0.132       | 0.786      |
| TAC NWS  | 0.36             | 0.551            | 0.174            | 0.449      | 0.87      | 0.304      | 0.036      | 0.172      | 0.227       | 0.466      |
| TOS NWS  | 0.955            | 0.733            | 0.456            | 0.994      | 0.714     | 0.196      | 0.013      | 0.594      | 0.73        | 0.016      |
| AGE NWS  | 0.316            | 0.715            | 0.436            | 0.423      | 0.414     | 0.819      | 0.133      | 0.031      | 0.705       | 0.353      |
| AOPP NWS | 0.727            | 0.821            | 0.15             | 0.974      | 0.236     | 0.523      | 0.409      | 0.472      | 1.79E-05    | 0.464      |
| MDA NWS  | 0.26             | 0.674            | 0.048            | 0.947      | 0.489     | 0.074      | 0.07       | 0.423      | 0.879       | 7.52E-10   |

**Table 11. R value of correlations between stimulated saliva (SWS) and plasma/erythrocytes redox biomarkers in healthy elderly people aged 65-85.**

|          | CAT erythrocytes | GPx erythrocytes | SOD erythrocytes | GSH plasma | UA plasma | TAC plasma | TOS plasma | AGE plasma | AOPP plasma | MDA plasma |
|----------|------------------|------------------|------------------|------------|-----------|------------|------------|------------|-------------|------------|
| CAT SWS  | -0.331           | 0.174            | 0.023            | 0.34       | 0.125     | 0.113      | -0.167     | 0.105      | -0.061      | -0.16      |
| Px SWS   | 0.146            | 0.208            | -0.231           | -0.203     | -0.141    | -0.084     | 0.06       | -0.409     | 0.303       | -0.196     |
| SOD SWS  | -0.085           | -0.097           | 0.055            | -0.085     | 0.163     | 0.274      | -0.092     | -0.09      | -0.055      | -0.194     |
| GSH SWS  | -0.068           | -0.089           | 0.255            | 0.161      | 0.139     | -0.264     | 0.322      | -0.025     | -0.1        | 0.073      |
| UA SWS   | 0.261            | -0.161           | 0.049            | 0.421      | -0.008    | 0.079      | -0.145     | -0.094     | 0.113       | 0.162      |
| TAC SWS  | 0.369            | -0.16            | 0.051            | -0.354     | 0.115     | 0.295      | 0.146      | -0.334     | -0.118      | -0.348     |
| TOS SWS  | -0.181           | 0.179            | -0.125           | -0.047     | -0.288    | -0.05      | -0.112     | -0.021     | -0.244      | -0.064     |
| AGE SWS  | -0.4             | 0.392            | -0.019           | -0.192     | 0.042     | -0.193     | 0.276      | 0.098      | -0.304      | -0.033     |
| AOPP SWS | 0.06             | -0.204           | 0.291            | 0.289      | 0.138     | -0.09      | -0.163     | 0.154      | -0.142      | -0.017     |
| MDA SWS  | -0.2             | -0.149           | -0.196           | 0.118      | 0.257     | 0.097      | 0.151      | -0.072     | -0.23       | 0.507      |

**Table 12. P value of correlations between stimulated saliva (SWS) and plasma/erythrocytes redox biomarkers in healthy elderly people aged 65-85.**

|          | CAT erythrocytes | GPx erythrocytes | SOD erythrocytes | GSH plasma | UA plasma | TAC plasma | TOS plasma | AGE plasma | AOPP plasma | MDA plasma |
|----------|------------------|------------------|------------------|------------|-----------|------------|------------|------------|-------------|------------|
| CAT SWS  | 0.074            | 0.359            | 0.902            | 0.066      | 0.512     | 0.552      | 0.377      | 0.581      | 0.747       | 0.399      |
| Px SWS   | 0.44             | 0.27             | 0.22             | 0.282      | 0.458     | 0.659      | 0.751      | 0.025      | 0.104       | 0.3        |
| SOD SWS  | 0.655            | 0.61             | 0.771            | 0.655      | 0.39      | 0.143      | 0.629      | 0.637      | 0.771       | 0.304      |
| GSH SWS  | 0.721            | 0.64             | 0.174            | 0.396      | 0.463     | 0.159      | 0.083      | 0.895      | 0.599       | 0.702      |
| UA SWS   | 0.163            | 0.395            | 0.797            | 0.021      | 0.968     | 0.677      | 0.446      | 0.621      | 0.551       | 0.391      |
| TAC SWS  | 0.045            | 0.398            | 0.79             | 0.055      | 0.545     | 0.114      | 0.441      | 0.072      | 0.533       | 0.06       |
| TOS SWS  | 0.34             | 0.345            | 0.511            | 0.805      | 0.123     | 0.791      | 0.556      | 0.912      | 0.194       | 0.737      |
| AGE SWS  | 0.028            | 0.032            | 0.921            | 0.31       | 0.826     | 0.306      | 0.14       | 0.606      | 0.103       | 0.863      |
| AOPP SWS | 0.754            | 0.279            | 0.118            | 0.121      | 0.467     | 0.637      | 0.388      | 0.417      | 0.454       | 0.927      |
| MDA SWS  | 0.289            | 0.431            | 0.299            | 0.535      | 0.171     | 0.611      | 0.425      | 0.703      | 0.222       | 0.004      |
